# Supplementary material for: A highly sensitive and selective chemosensor for Pb2+ based on quinoline–coumarin
Source: Royal Society of Chemistry journal article supplement (doi:10.1039/c8ra04935a), 2018-01-01
Supplement: c8ra04935a1.pdf [file c8ra04935a1.pdf]

## Supporting Information

### **A Highly Sensitive and Selective Chemosensor for Pb<sup>2+</sup> Based on Quinoline-coumarin**

Xianjiao Meng<sup>a</sup>, Duanlin Cao<sup>a</sup>, Zhiyong Hu<sup>ab</sup>, Xinghua Han<sup>ab</sup>, Zhichun Li<sup>a</sup>,  
Wenbing Ma<sup>\* ab</sup>

Email: [mawenbing@nuc.edu.cn](mailto:mawenbing@nuc.edu.cn); [306421966@qq.com](mailto:306421966@qq.com)

<sup>a</sup> School of Chemical Engineering and Technology, North University of China,  
Taiyuan 030051, P.R. China.

<sup>b</sup> National Demonstration Center for Experimental Comprehensive Chemical  
Engineering Education

| <b>CONTENTS</b>                                           | <b>PAGE</b> |
|-----------------------------------------------------------|-------------|
| 1. Determination of association constant.....             | 3           |
| 2. <sup>1</sup> H NMR spectra of compound <b>1</b> .....  | 4           |
| 3. <sup>13</sup> C NMR spectra of compound <b>1</b> ..... | 5           |
| 4. ESI-MS spectra of compound <b>1</b> .....              | 6           |

## 1. Determination of association constant

The association constants ( $K_a$ ) were also determined based on the fluorescent titration curve using the equation as follows:

Where  $F$  and  $F_0$  represent the intensity of host in the presence and absence of ions, respectively,  $F_{max}$  is the saturated intensity of host in the presence of excess amount of ions;  $[X]$  is the concentration of ions added.

$$\frac{1}{F - F_0} = \frac{1}{F_{max} - F_0} \left[ \frac{1}{K_a[X]} + 1 \right]$$

## 2. $^1\text{H}$ NMR spectra

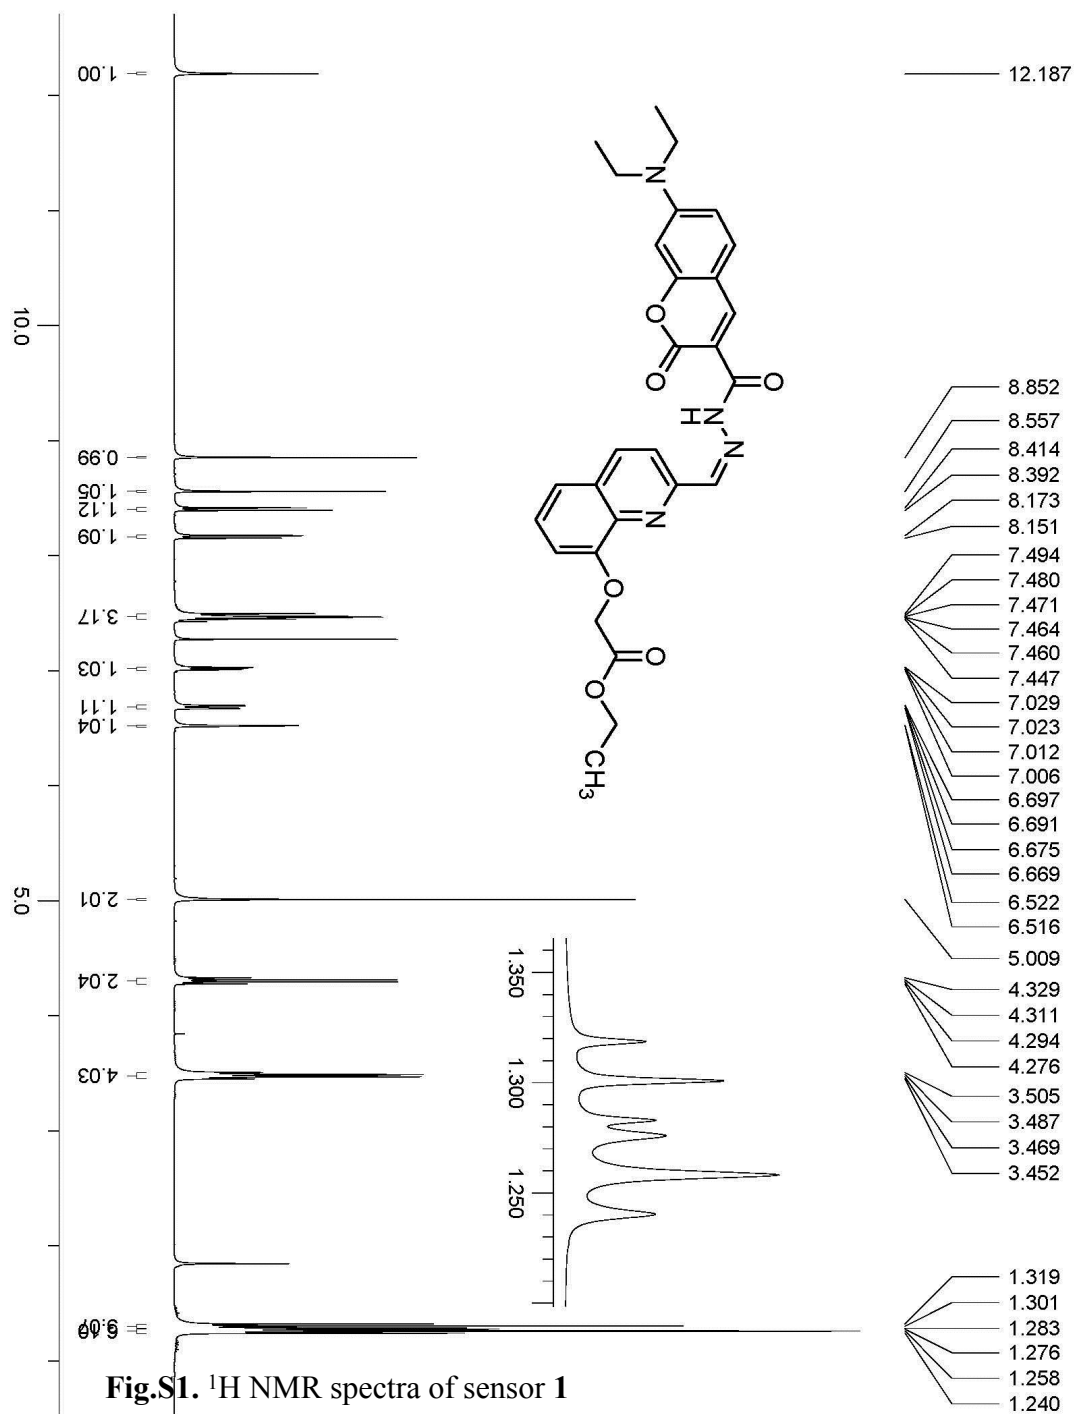

Fig.S1.  $^1\text{H}$  NMR spectra of sensor 1

## 3. $^{13}\text{C}$ NMR spectra of sensor 1



# Peking University Mass Spectrometry Sample Analysis Report

**Analysis Info**  
 Analysis Name: FTMS-18050170\_Pos\_20180523\_000002.d  
 Sample: 2  
 Comment:  
 Acquisition Date: 5/23/2018 11:09:13 AM  
 Instrument: Bruker Solarix XR FTMS  
 Operator: Peking University

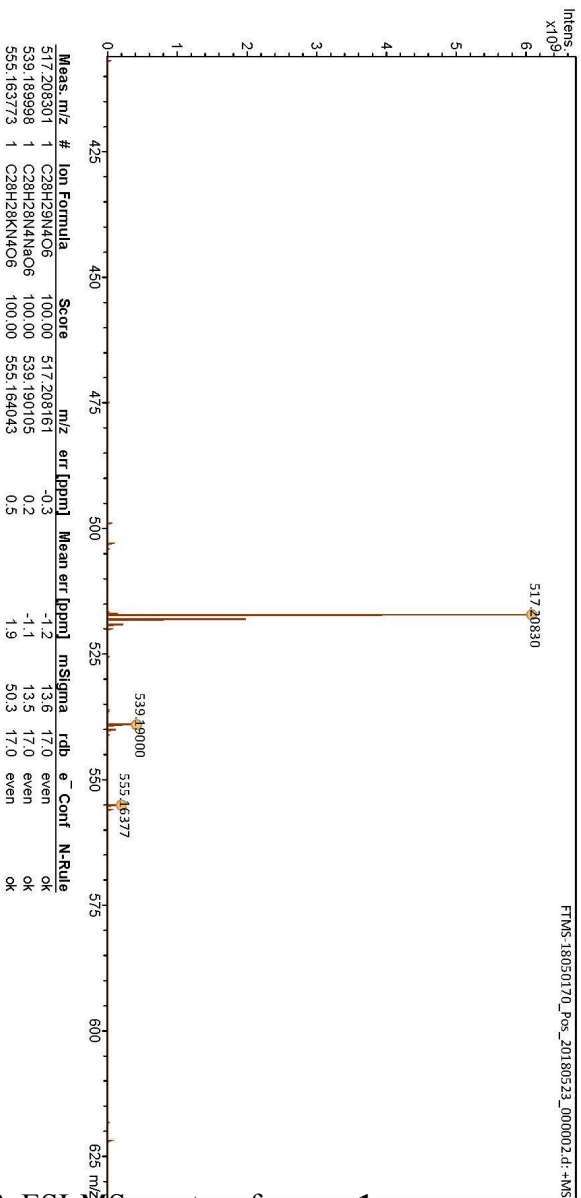

**Fig.S3. ESI-MS spectra of sensor 1**
